## **Tasks and responsibilities in physical activity promotion of older patients during hospitalization: A nurse perspective**

Kira Scheerman<sup>1,2</sup>, Joram W. Mesters<sup>1</sup>, Jay N. Borger<sup>1</sup>, Carel G. M. Meskers<sup>2,3</sup>, Andrea B. Maier<sup>2,4,5\*</sup>

<sup>1</sup> Department of Internal Medicine, Section of Gerontology and Geriatrics, Amsterdam UMC, Vrije Universiteit Amsterdam, Amsterdam, The Netherlands

<sup>2</sup> Amsterdam Movement Sciences, Amsterdam, The Netherlands

<sup>3</sup> Department of Rehabilitation Medicine, Amsterdam UMC, Vrije Universiteit Amsterdam, Amsterdam, The Netherlands

<sup>4</sup> Department of Human Movement Sciences, @AgeAmsterdam, VU University, Amsterdam, The Netherlands

<sup>5</sup> Department of Medicine and Aged Care, @AgeMelbourne, Royal Melbourne Hospital, University of Melbourne, Melbourne, Australia

\*Corresponding author: [andrea.maier@unimelb.edu.au](mailto:andrea.maier@unimelb.edu.au) (AM)

**Short title:** Physical activity promotion: a nurse perspective

**Number of words (abstract):** 208

**Number of words (text):** 2920

**Number of references:** 43

**Number of tables:** 3

**Number of figures:** 1

## 1 **Abstract**

2 **Objective:** To investigate how nurses perceive tasks and responsibilities in promoting  
3 physical activity during hospitalization of older patients and which factors are of influence.

4 **Design:** Observational cohort study

5 **Setting and participants:** One hundred and eight nurse students, nurses and nurse  
6 supervisors employed by an academic Dutch teaching hospital participated in a questionnaire  
7 survey and 51 nurses took part in a subsequent in-depth interview.

8 **Measures:** Data were collected on tasks and responsibilities in physical activity promotion  
9 and their influencing factors as perceived by nurses. Descriptive statistics were used to  
10 analyze the data from the questionnaire survey and a deductive approach with directed content  
11 analysis was used for the data from the interviews.

12 **Results:** Nurses perceived to have a dominant role in physical activity promotion of older  
13 patients during hospitalization. Ninety percent of the nurses stated to be responsible for  
14 physical activity promotion and 32 percent stated to be satisfied with the actual level of  
15 physical activity of their patients. Influencing factors were low patient motivation, high  
16 workload causing priority shifts of tasks and the role of physicians.

17 **Conclusion:** Although their perceived dominant role in physical activity promotion, nurses  
18 identified a number of barriers interfering with actual level of physical activity. Improvement  
19 strategies should involve physicians, patients and carers.

## 20 **Introduction**

21 More than one third of all hospital discharges in the US affects patients 65 years or older  
22 (Data from Healthcare Cost and Utilization Project database 2013). Older hospitalized  
23 patients spend most of the time lying in bed (1-5) while physical inactivity in this group is  
24 associated with functional decline (6, 7), readmissions (8), nursing home admissions and  
25 death (6).

26 The level of physical activity during hospitalization has been indicated as a modifiable  
27 risk factor for complications related to hospitalization (9). Patient related, organizational and  
28 environmental factors have been shown to contribute to physical activity promotion of  
29 hospitalized older patients (10-13). Nurses are a vital actor due to the high amount of patient  
30 contact hours. Based on the education and professional profile, nurses are expected to signal  
31 risks and perform tasks to promote physical activity during hospitalization (14-18). However,  
32 it was shown that nurses infrequently initiate physical activity during hospitalization (19, 20),  
33 whereas evidence on the perception of nurses on their role in physical activity promotion is  
34 scarce (21).

35 The aim of the study was to investigate how nurses perceive tasks and responsibilities  
36 in promoting physical activity and to gain insight in what factors influence physical activity  
37 promotion by nurses in older patients during hospitalization.

## 38 **Methods**

### 39 **Study design**

40 This study encompassed both questionnaire surveys (March to July 2016) and in-depth  
41 interviews (June to August 2017). The study was conducted at an academic teaching hospital  
42 in The Netherlands and was approved by the medical ethical committee of Amsterdam UMC.  
43 All enrolled nurses provided written informed consent.

44

### 45 **Participants**

46 Nurses were eligible when they were 18 years and older, were working on wards providing  
47 care to patients 70 years and older and had provided care to at least one patient of 70 years or  
48 older in the previous month. Nurses working on the medium or intensive care unit were  
49 excluded. All wards, with exception of gynecology and pulmonology, were included for the  
50 questionnaire component. Included wards for the interview component were: internal  
51 medicine, traumatology, oncological surgery and a combined ward of vascular surgery,  
52 nephrology and urology. Nurses were selected at random from staff lists using a numerical lot  
53 drawing. Participation in both the questionnaire as well as interview component was allowed.  
54 The questionnaire component addressed nurse students, nurses and nurse supervisors. For the  
55 interview component only nurses were included.

56

### 57 **Procedure**

#### 58 **Questionnaire component**

59 A questionnaire was developed to investigate tasks and responsibilities in physical activity  
60 promotion and factors influencing physical activity promotion during hospitalization of older  
61 patients as perceived by nurses. Questions were compiled by interviewing three nurses after  
62 they filled in the questionnaire and tested on feasibility and nurses' interpretation. Selected  
63 nurses were approached by the head of the ward or by a researcher (JB). Questionnaire  
64 completion took approximately 20 minutes.

65 The following data were collected: age, gender, educational level, work experience,  
66 education on physical activity promotion, self-perceived motivation to promote physical  
67 activity, responsibilities in physical activity promotion, self-perceived level of knowledge of  
68 physical activity promotion, satisfaction of physical activity promotion of the ward,  
69 satisfaction of physical activity promotion of physicians and satisfaction of level of physical  
70 activity of the patient. Nurses were asked if they considered daily activities (e.g. teeth  
71 brushing at the sink, walking towards the toilet), unsupervised additional physical activity  
72 (e.g. stretch and gait exercises), additional physical activity supervised by a nurse and  
73 additional physical activity supervised by other health care professionals as physical activity  
74 during hospitalization and whether they promote daily activities, additional physical activity  
75 or consulted other health care professionals. Furthermore, nurses were asked to score the  
76 importance of 34 factors in physical activity promotion of older patients during  
77 hospitalization using a Likert-scale from 1 (totally not important) to 5 (very important) and to  
78 indicate their most important factor. Factors were selected based on literature and were  
79 categorized in characteristics of the professional, patient, organization or intervention, and  
80 social factors (22-30).

81

## 82 **Interview component**

83 Targeted semi-structured interviews were conducted to gain in-depth information on nurses'  
84 perspective on task and responsibilities of different actors in physical activity promotion and  
85 factors influencing physical activity promotion. The interview design was evaluated on  
86 feasibility and interpretation of the questions during a pilot interview with two nurses and,  
87 after adjustments, re-evaluated in a second pilot interview with two different nurses. Selected  
88 nurses were approached by the head of the ward or by the researcher (JM). Interviews were  
89 held in private rooms and had a duration of 30 to 50 minutes. The interviews were held by  
90 one researcher (JM), the first ten interviews were supervised by a second researcher (KS). The  
91 interviews were audio recorded and notes were made.

92 A patient case was provided at the start of the interview, describing a 82 year old  
93 woman with urosepsis, who had high fever and showed signs of delirium at admission,  
94 progressively got better at days two of admission and almost completely recuperated at day  
95 five of admission. Nurses were asked to define physical activity during hospitalization, to  
96 score the importance of physical activity promotion on a VAS-score and to describe how  
97 satisfied they were with the level of physical activity promotion during hospitalization. Tasks  
98 and responsibilities of nurses, physiotherapists, occupational therapists, physicians, patients,  
99 and carers were further explored with questions on the nurses' perspective on responsibilities  
100 in signaling and performing different physical activity promotion tasks; transfer from bed to  
101 chair, activities of daily living, supervised and unsupervised additional physical activity.  
102 Nurses were also asked to motivate which actor they thought to have final responsibility of  
103 execution of these tasks and, subsequently, if these responsibilities would change when a  
104 patient would be able to, but not performing physical activity during hospitalization. Factors

105 influencing physical activity promotion were discussed when nurses named factors during the  
106 interview and explicitly at the end of the interview supported with an overview of the 34  
107 factors used in the questionnaire.

108

## 109 **Data processing and analysis**

### 110 **Questionnaire component**

111 Statistics were performed using IBM SPSS statistics 22.0. Data were expressed as number  
112 and percentages. Factors were considered important when Likert scores exceeded four.  
113 Fishers exact test was used to analyze differences between nurse students, nurses and nurse  
114 supervisors.

115

### 116 **Interview component**

117 The interviews were fully transcribed and data on nurse characteristics, importance of  
118 physical activity promotion, tasks and responsibilities were analyzed quantitatively and  
119 qualitatively. A deductive approach with directed content analysis was used (31, 32) to  
120 analyze the qualitative data. Interview transcripts were read through and initial coding with  
121 pre-determined codes based on the topics of the interview were added to the correlating text.  
122 Open coding was used to refine labels. Atlas.ti 8.0 was used in the qualitative coding process.  
123 Discussions on interpreting data took place between two researchers (JM and KS) and all  
124 codes and data were verified by a second researcher (KS).



## 125 **Results**

126 All 108 selected (student) nurses participated in the questionnaire component of the study. In  
127 the interview component, three nurses refused to participate resulting in a total of 51  
128 interviews, see Table 1 for the characteristics of the participating nurses. Eighty-six percent of  
129 the nurses was female and the nurses in the questionnaire and interview component had a  
130 comparable median age (32 vs. 31 years) and level of work experience (6 vs. 7 years). In the  
131 questionnaire component, more nurses had a high educational level compared to the interview  
132 component (57.6% vs. 47.1%). A minority of nurse students (38.5%), nurses (20.0%) and  
133 nurse supervisors (30.0%) received education on physical activity promotion in the prior year.

134 **Table 1: Characteristics of the study population, stratified by nurse student, nurse and nurse supervisor (questionnaire component,**  
 135 **n=108 and interview component, n=51).**

|                                                      | Questionnaire         |                |                          | Interview      |
|------------------------------------------------------|-----------------------|----------------|--------------------------|----------------|
|                                                      | Nurse student<br>n=13 | Nurse<br>n=85  | Nurse supervisor<br>n=10 | Nurse<br>n=51  |
| Age, y, median [IQR]                                 | 25 [23.0-29.0]        | 32 [25.0-51.0] | 49 [42.8-54.5]           | 31 [26.0-45.0] |
| Female, n (%)                                        | 11 (84.6)             | 73 (85.9)      | 10 (100)                 | 44 (86.3)      |
| Educational level high <sup>A</sup> , n (%)          | 7 (53.8)              | 49 (57.6)      | 10 (100)                 | 24 (47.1)      |
| Work experience nurse, y, median [IQR]               | N/A                   | 6 [3.0 – 20.0] | 25 [19.3– 30.3]          | 7 [2.5- 18.0]  |
| Work experience nurse supervisor,<br>y, median [IQR] | N/A                   | N/A            | 7 [5.5 – 10.0]           | N/A            |
| Education about PA promotion last year, yes, n (%)   | 5 (38.5)              | 17 (20.0)      | 3 (30.0)                 | N/a            |

136 A: High educational level defined as applied university and higher; N/A: not applicable; N/a: not available; PA: physical activity.

## 137 **Tasks and responsibilities in physical activity promotion**

138 The questionnaire component revealed that nurses feel responsible (89.4%) to promote  
 139 physical activity during hospitalization. As presented in Table 2, nurses promote daily  
 140 activities (95.3%) and consult other health care professionals to promote physical activity  
 141 (90.6%). Seventy-eight percent of the nurses stated to actively promote additional physical  
 142 activity like stretch and gait exercises. Only one nurse reported to not promote physical  
 143 activity at all. No differences were observed between nurse students, nurses and nurse  
 144 supervisors. Eighty-seven percent of the respondents stated that physiotherapists, physicians  
 145 or the patients had responsibilities in physical activity promotion. Occupational therapists  
 146 (13%) and carers (22%) were also mentioned to be responsible.

147

148 **Table 2: Perception of physical activity promotion during hospitalization and methods**  
 149 **to promote physical activity, stratified by nurse student, nurse and nurse supervisor**  
 150 **(questionnaire component, n=108).**

|                                                                      | Nurse<br>student<br>n=13 | Nurse<br>n=85 | Nurse<br>supervisor<br>n=10 |
|----------------------------------------------------------------------|--------------------------|---------------|-----------------------------|
| <b>Perception of physical activity promotion, n (%)</b>              |                          |               |                             |
| Motivated to promote PA, yes                                         | 12 (92.3)                | 83 (97.6)     | 10 (100)                    |
| Responsible to promote PA, yes                                       | 13 (100)                 | 76 (89.4)     | 10 (100)                    |
| Self-perceived level of knowledge about PA<br>promotion, sufficient  | 9 (69.2)*                | 77 (90.6)     | 8 (80.0)                    |
| PA promotion on ward, present                                        | 8 (61.5)                 | 45 (52.9)     | 6 (60.0)                    |
| Satisfied with PA promotion on ward, yes                             | 9 (69.2)                 | 56 (65.9)     | 7 (70.0)                    |
| Satisfied with PA promotion by physicians, yes                       | 5 (38.5)                 | 41 (48.2)     | 6 (60.0)                    |
| Satisfied with level of PA of patient, yes                           | 4 (30.8)                 | 27 (31.8)     | 4 (40.0)                    |
| <b>Definition of physical activity during hospitalization, n (%)</b> |                          |               |                             |
| Daily activities                                                     | 12 (92.3)                | 68 (80.0)     | 8 (80.0)                    |

|                                                                             |           |           |          |
|-----------------------------------------------------------------------------|-----------|-----------|----------|
| Unsupervised additional PA of patient                                       | 10 (76.6) | 66 (77.6) | 8 (80.0) |
| Supervised additional PA with nurse                                         | 11 (84.6) | 70 (82.4) | 8 (80.0) |
| Supervised additional PA with other health care professionals               | 12 (93.2) | 68 (80.0) | 8 (80.0) |
| <b>Methods of physical activity promotion during hospitalization, n (%)</b> |           |           |          |
| Promote daily activities                                                    | 12 (92.3) | 81 (95.3) | 10 (100) |
| Promote additional PA (e.g. stretch and gait exercises)                     | 9 (69.2)  | 66 (77.6) | 8 (80.0) |
| Consult other health care professionals to promote PA                       | 11 (84.6) | 77 (90.6) | 10 (100) |
| I do not promote PA                                                         | 0 (0)     | 1 (1.2)   | 0 (0)    |

151 PA; physical activity; \*: Difference between nurse student, nurse and nurse supervisor  
 152 (P<0.05).

153

154 During the interviews, nurses stated to be responsible for signaling and performing  
 155 physical activity promotion tasks and had final responsibility for transfers from bed to chair  
 156 and promotion of daily activities. Nurses indicated that physiotherapists have a greater  
 157 responsibility of supervised additional physical activity and it is the patients responsibility to  
 158 do unsupervised additional physical activity. The majority of the nurses stated that patients'  
 159 responsibilities increase when patients become more independent during hospital admission  
 160 and that they would motivate patients to be physically active by providing information on  
 161 consequences of physical inactivity and discussing the reasons for the patients' physical  
 162 inactivity. The tasks and responsibilities of the physician were described as to determine the  
 163 patient's ability to perform different levels of physical activity and to motivate patients when  
 164 they refuse to perform physical activity. The different tasks and responsibilities in physical  
 165 activity promotion of all actors according to nurses are visualized in Fig 1.

166

167 **Fig 1: Tasks and responsibilities of different actors in physical activity promotion during**  
168 **hospitalization according to nurses (%) (interview component, n=51). PA: Physical**  
169 **activity**

170

## 171 **Factors influencing physical activity promotion**

172 Sixty-six percent of nurses of the questionnaire component were satisfied with physical  
173 activity promotion on their ward, 48% were satisfied with physical activity promotion by  
174 physicians, and 32% were satisfied with the actual level of physical activity of the patients  
175 during hospitalization. An overview of the importance of factors influencing physical activity  
176 promotion during hospitalization is provided in Table 3. Differences in importance between  
177 nurse students, nurses and nurse supervisors were observed for the factors ‘Fear of falling  
178 during PA promotion’, ‘Availability of protocol’ and ‘Opinion towards PA promotion of  
179 colleagues’.

180 **Table 3: Importance of factors (Likert-score >3) influencing physical activity promotion in older patients during hospitalization,**  
 181 **stratified by nurse student, nurse and nurse supervisor (questionnaire component, n=108).**

|                                                   | Importance<br>(Likert-score >3) |                            |                 | Fisher's<br>exact<br>test | Rated as<br>most<br>important<br>(%) |                               |
|---------------------------------------------------|---------------------------------|----------------------------|-----------------|---------------------------|--------------------------------------|-------------------------------|
|                                                   | Overall<br>(n=108)              | Nurse<br>student<br>(n=13) | Nurse<br>(n=85) |                           |                                      | Nurse<br>supervisor<br>(n=10) |
| <b>Characteristics of the professional, n (%)</b> |                                 |                            |                 |                           |                                      |                               |
| Motivation for PA promotion                       | 96 (88.9)                       | 11 (84.6)                  | 76 (89.4)       | 9 (90.0)                  | .854                                 | 2.8                           |
| Knowledge of methods of PA promotion              | 97 (89.8)                       | 12 (92.3)                  | 75 (88.2)       | 10 (100)                  | .845                                 | 0.9                           |
| Knowledge of importance of PA promotion           | 99 (91.7)                       | 11 (84.6)                  | 78 (91.8)       | 10 (100)                  | .448                                 | 7.4                           |
| Fear of loss of function when PA is not promoted  | 66 (61.1)                       | 9 (69.2)                   | 51 (60.0)       | 6 (60.0)                  | .882                                 | 1.9                           |
| Fear of decubitus ulcer when PA is not promoted   | 85 (78.7)                       | 10 (76.9)                  | 68 (80.0)       | 7 (70.0)                  | .704                                 | 0.9                           |
| Fear of falling during PA promotion               | 43 (39.8)                       | 2 (15.4)                   | 39 (45.9)       | 6 (60.0)                  | .049*                                | -                             |
| <b>Characteristics of the patient , n (%)</b>     |                                 |                            |                 |                           |                                      |                               |
| Admission diagnosis                               | 81 (75.0)                       | 7 (53.8)                   | 68 (80.0)       | 6 (60.0)                  | .068                                 | 4.6                           |
| Comorbidity                                       | 81 (75.0)                       | 8 (61.5)                   | 65 (76.5)       | 8 (80.0)                  | .483                                 | 2.8                           |
| Delirium                                          | 86 (79.6)                       | 11 (84.6)                  | 66 (77.6)       | 9 (90.0)                  | .758                                 | -                             |
| Dementia                                          | 48 (44.4)                       | 4 (30.8)                   | 38 (44.7)       | 6 (60.0)                  | .393                                 | -                             |
| Pain                                              | 96 (88.9)                       | 13 (100)                   | 74 (87.1)       | 9 (90.0)                  | .466                                 | 7.4                           |
| Physical constraints                              | 98 (90.7)                       | 11 (84.6)                  | 77 (90.6)       | 10 (100)                  | .494                                 | 2.8                           |

|                                                   |            |           |           |          |       |      |
|---------------------------------------------------|------------|-----------|-----------|----------|-------|------|
| Motivation performing PA                          | 90 (83.3)  | 12 (92.3) | 72 (84.7) | 6 (60.0) | .106  | 11.1 |
| Self-efficacy performing PA                       | 83 (76.9)  | 10 (76.9) | 66 (77.6) | 7 (70.0) | .846  | 0.9  |
| Ethnic background                                 | 40 (37.0)  | 2 (15.4)  | 34 (40.0) | 4 (40.0) | .249  | -    |
| Language barrier                                  | 48 (44.4)  | 4 (30.8)  | 41 (48.2) | 3 (30.0) | .346  | -    |
| <b>Characteristics of the organization, n (%)</b> |            |           |           |          |       |      |
| Availability of equipment                         | 107 (99.1) | 13 (100)  | 84 (98.8) | 10 (100) | 1.000 | 2.8  |
| User friendliness of equipment                    | 104 (96.3) | 12 (92.3) | 82 (96.5) | 10 (100) | .622  | -    |
| Staffing ratio                                    | 102 (94.4) | 12 (92.3) | 80 (94.1) | 10 (100) | .771  | 14.8 |
| Workload                                          | 83 (76.9)  | 8 (61.5)  | 68 (80.0) | 7 (70.0) | .269  | 9.3  |
| Physical environment of ward                      | 86 (79.6)  | 8 (61.5)  | 69 (81.2) | 9 (90.0) | .197  | 1.9  |
| Educational support for PA promotion              | 73 (67.6)  | 7 (53.8)  | 57 (67.1) | 9 (90.0) | .197  | 0.9  |
| <b>Characteristics of the intervention, n (%)</b> |            |           |           |          |       |      |
| Availability of protocol                          | 41 (38.0)  | 1 (7.7)   | 35 (41.2) | 5 (50.0) | .038* | -    |
| Clarity of instructions of protocol               | 50 (46.3)  | 4 (30.8)  | 41 (48.2) | 5 (50.0) | .515  | -    |
| Evidence based practice                           | 53 (49.1)  | 5 (38.5)  | 42 (49.4) | 6 (60.0) | .615  | -    |
| Availability of information materials             | 77 (71.3)  | 6 (46.2)  | 62 (72.9) | 9 (90.0) | .062  | -    |
| PA promotion incorporated in daily work routine   | 92 (85.2)  | 11 (84.6) | 71 (83.5) | 10 (100) | .540  | -    |
| Time investment in PA promotion                   | 90 (83.3)  | 11 (84.6) | 69 (81.2) | 10 (100) | .459  | 0.9  |
| Visible progress after PA promotion               | 88 (81.5)  | 9 (69.2)  | 70 (82.4) | 9 (90.0) | .447  | -    |
| <b>Social factors, n (%)</b>                      |            |           |           |          |       |      |
| Culture PA promotion at ward                      | 94 (87.0)  | 12 (92.3) | 73 (85.9) | 9 (90.0) | 1.000 | -    |
| PA promotion by physician                         | 88 (81.5)  | 9 (69.2)  | 70 (82.4) | 9 (90.0) | .447  | -    |
| Opinion towards PA promotion of colleagues        | 63 (58.3)  | 4 (30.8)  | 50 (58.8) | 9 (90.0) | .016* | -    |
| Influence of cares on PA promotion                | 100 (92.6) | 12 (92.3) | 79 (92.9) | 9 (90.0) | .818  | -    |

|     |                                         |           |          |           |          |      |   |
|-----|-----------------------------------------|-----------|----------|-----------|----------|------|---|
| 182 | Professional patient–nurse relationship | 56 (51.9) | 6 (46.2) | 46 (54.1) | 4 (40.0) | .694 | - |
|-----|-----------------------------------------|-----------|----------|-----------|----------|------|---|

---

PA; physical activity; \*: Difference between nurse student, nurse and nurse supervisor (P<0.05).



## 183 **Characteristics of the professional**

184 Almost all nurses scored knowledge of methods of physical activity promotion (88.2%),  
185 knowledge of importance of physical activity promotion (91.8%) and nurse' motivation  
186 (89.4%) as important factors influencing physical activity promotion (Table 3). Nurses  
187 perceived their level of knowledge of physical activity promotion as sufficient (90.6%) in  
188 contrast to 69.2% of the nurse students (Table 2). Nurses were motivated to promote physical  
189 activity (97.6%) and considered daily activities (80.0%) and additional physical activity  
190 supervised by a nurse (82.4%) or other health care professional (80.0%) as physical activity  
191 during hospitalization (Table 2). Unsupervised additional physical activity was not seen as  
192 physical activity during hospitalization by 22.4% of the nurses. No differences were observed  
193 between the nurse students, nurses and nurse supervisors.

194 During the interviews, nurses described physical activity during hospitalization as:  
195 “out of bed”, “walking”, “movement in bed” and “sitting in chair”. Nurses scored the  
196 importance of physical activity during hospitalization with a median VAS score of 8.9 [5.5-  
197 10.0]. Most frequently named motivations were preventing risk of complications (e.g.  
198 decubitus and pneumonia), loss of muscle mass and slower recovery. Long term adverse  
199 outcomes like functional loss and regaining self-reliance were named less frequent compared  
200 with more immediate noticeable adverse outcomes. Nurses stated they were not always  
201 motivated to promote physical activity, because they were empathic towards patients  
202 facilitating comfort rather than physical activity. Also, the need for physical activity  
203 promotion in older patients was questioned. Nurses stated to understand the low motivation of  
204 older patients when being sick, had a bad night sleep or being tired after a day with multiple  
205 examinations.

206

## 207 **Characteristics of the patient**

208 Physical constraints (90.6%), pain (87.1%) and motivation of the patient (84.7%) were  
209 identified as important factors in physical activity promotion (Table 3). The factor  
210 ‘motivation performing physical activity’ was scored as most important by 11.1% of the  
211 nurses.

212 During the interviews, patient motivation was stated as a barrier by 65% of nurses.  
213 Tiredness, pain, lines like catheters and drip-lines, their previous inactivity at home and the  
214 belief it is uncommon to be physically active at an older age were explanations for a low  
215 motivation of patients. In addition, the patient’ perception of the hospital admission (47%) as  
216 a place to rest, be sick and were it is justified to be physically inactive was identified as factor  
217 influencing the patient’ level of physical activity during hospitalization. Seventy-three percent  
218 of the nurses suggested hospitals to focus on increasing patient awareness on importance of  
219 physical activity, for example using a flyer or video.

220

## 221 **Characteristics of the organization**

222 Sufficient staffing ratio (94.1%) and availability of equipment (98.8%) were identified as  
223 important factors in physical activity promotion (Table 3). The factor ‘staffing ratio’ was  
224 scored as most important by 14.8% of the nurses.

225 Nurses in the interview group stated that in case of a high number of complex patients  
226 (e.g. patients with delirium, physical impairments or multiple drip lines), workload and  
227 staffing ratio become barriers. Priorities shifts when nurses experienced a low staff ratio and a  
228 high workload; physical activity was regarded as one of the first activities to be dropped and

229 nurses stated that concessions were made in their physical activity promotion (e.g. use of bed  
230 urinal). Nurses suggested hospitals to invest in more staff (physiotherapists and medical  
231 students), equipment and adjustment of patient rooms to make them more attractive for  
232 physical activity. A living room, walking routes and activity counseling were other  
233 suggestions to increase physical activity of the older patients during hospitalization.

234

### 235 **Characteristics of the intervention and social factors**

236 Social factors like influence of carers (92.9%), culture of physical activity promotion on ward  
237 (85.9%), and physical activity promotion by the physician (82.4%) were indicated as  
238 important factors in physical activity promotion. Availability (41.2%) and clarity (48.2%) of a  
239 protocol regarding physical activity promotion were scored less frequently as important factor  
240 in the questionnaire component (Table 3).

## 241 **Discussion**

242 Nurses perceive to have a dominant role in physical activity promotion and feel responsible,  
243 however, they were not satisfied with the actual level of physical activity of older patients  
244 during hospitalization. Low patient motivation and priority shifts of tasks due to high  
245 workload were indicated as barriers. In addition, the role of physicians was indicated to be  
246 important to influence physical activity promotion behavior.

247

### 248 **Tasks and responsibilities in physical activity promotion**

249 This study indicated that nurses have to adopt various roles in physical activity promotion  
250 during older patients' hospital admissions. Besides signaling and supporting physical activity  
251 promotion tasks and consulting other health care professional, nurses have an important role  
252 in motivating patients. Motivating patients and supporting self-management become more  
253 prominent in nursing (33, 34). However, nurse activities in physical activity promotion during  
254 hospitalization seem to target prevention of potential harm more than supporting  
255 rehabilitation goals (35). The reserved attitude of a part of the nurses in our study regarding  
256 physical activity of older patients during hospitalization and unsupervised physical activity  
257 suggests that the perception on physical activity during hospitalization needs further attention.

258

### 259 **Factors influencing physical activity promotion**

260 The identified factors influencing physical activity promotion by nurses, most importantly  
261 patient motivation and high workload causing priority shifts of tasks, are in line with previous

262 studies addressing barriers in physical activity promotion during hospitalization (10, 13, 36,  
263 37). The nurses in our study suggested to increase patient awareness on the importance of  
264 physical activity. Barriers for being physically active during the hospital admission from a  
265 patient perspective were previously addressed (10), but better understanding of what causes  
266 low patient motivation is important.

267         According to the nurses in our study, physical activity promotion tasks became less of  
268 a priority when nurses experienced a low staff ratio and a high workload. Staff ratio and  
269 workload are associated with nursing tasks being left undone which was found to be related to  
270 the nurses perception of quality of nursing care (38). In addition, an increase in nurses'  
271 workload was found to affect patient outcomes (39). This implies that nurse staffing levels  
272 should be increased or tasks must shift towards other actors or targeted by eHealth  
273 interventions (40). However, intervention studies on physical activity promotion of  
274 hospitalized patients showed positive results on physical activity levels using preexisting staff  
275 ratios (41, 42).

276         In the current study, physical activity promotion by the physician and carers  
277 involvement were indicated as influencing factors. Physicians were expected to indicate the  
278 ability of patients to be physical active. Physicians orders regarding physical activity are  
279 found to influence patients' decisions to perform physical activity during hospitalization (43)  
280 but are infrequently discussed (43) and often bed rest orders during hospital admission do not  
281 have valid and specified reasons (6). Awareness of the role of physicians in physical activity  
282 promotion might contribute to strengthen nurses' physical activity promotion behavior and  
283 increase physical activity levels of older hospitalized patients. Furthermore, carers could play  
284 a more prominent role in physical activity promotion. In our study the role of carers in

285 physical activity promotion during hospitalization was indicated as minor, but including  
286 carers in physical activity promotion of older patients was previously emphasized (13).

287

## 288 **Strengths and limitations**

289 This study used a mixed-methods approach and included a large group of nurses to explore  
290 the tasks and responsibilities in physical activity promotion of older patients during  
291 hospitalization. The questionnaire and interview design were self-developed and not cross  
292 validated. The use of another validated instrument was not possible while there was none  
293 available for this specific interest. However, both questionnaire and interview design were  
294 based on literature and tested in advance on feasibility and interpretation of the questions.

295

## 296 **Conclusion**

297 Nurses perceive to have various roles in physical activity promotion and feel responsible, but  
298 they were not satisfied with the level of physical activity of patients. Contributing factors  
299 were low patient motivation and priority shifts due to high workload. Hospital managers and  
300 health care professionals should be aware of the various roles of nurses in physical activity  
301 promotion. Emphasis should be on the multidisciplinary approach of physical activity  
302 promotion including physicians, patients, and carers.

## **Acknowledgements**

We thank the nurses for participating, Irene Jongerden for her help during interview design and Melina van Gunsteren for her advice during drafting the manuscript.

## References

1. Brown CJ, Redden DT, Flood KL, Allman RM. The underrecognized epidemic of low mobility during hospitalization of older adults. *Journal of the American Geriatrics Society*. 2009;57(9):1660-5.
2. Callen BL, Mahoney JE, Grieves CB, Wells TJ, Enloe M. Frequency of hallway ambulation by hospitalized older adults on medical units of an academic hospital. *Geriatric nursing (New York, NY)*. 2004;25(4):212-7.
3. Fisher SR, Goodwin JS, Protas EJ, Kuo YF, Graham JE, Ottenbacher KJ, et al. Ambulatory activity of older adults hospitalized with acute medical illness. *Journal of the American Geriatrics Society*. 2011;59(1):91-5.
4. Pedersen MM, Bodilsen AC, Petersen J, Beyer N, Andersen O, Lawson-Smith L, et al. Twenty-four-hour mobility during acute hospitalization in older medical patients. *The journals of gerontology Series A, Biological sciences and medical sciences*. 2013;68(3):331-7.
5. Sallis R, Roddy-Sturm Y, Chijioke E, Litman K, Kanter MH, Huang BZ, et al. Stepping toward discharge: Level of ambulation in hospitalized patients. *Journal of hospital medicine*. 2015;10(6):384-9.
6. Brown CJ, Friedkin RJ, Inouye SK. Prevalence and outcomes of low mobility in hospitalized older patients. *Journal of the American Geriatrics Society*. 2004;52(8):1263-70.
7. Zisberg A, Shadmi E, Sinoff G, Gur-Yaish N, Srulovici E, Admi H. Low mobility during hospitalization and functional decline in older adults. *Journal of the American Geriatrics Society*. 2011;59(2):266-73.



8. Fisher SR, Graham JE, Ottenbacher KJ, Deer R, Ostir GV. Inpatient Walking Activity to Predict Readmission in Older Adults. *Archives of physical medicine and rehabilitation*. 2016;97(9 Suppl):S226-31.
9. Zisberg A, Shadmi E, Gur-Yaish N, Tonkikh O, Sinoff G. Hospital-associated functional decline: the role of hospitalization processes beyond individual risk factors. *Journal of the American Geriatrics Society*. 2015;63(1):55-62.
10. Brown CJ, Williams BR, Woodby LL, Davis LL, Allman RM. Barriers to mobility during hospitalization from the perspectives of older patients and their nurses and physicians. *Journal of hospital medicine*. 2007;2(5):305-13.
11. Hoyer EH, Brotman DJ, Chan KS, Needham DM. Barriers to early mobility of hospitalized general medicine patients: survey development and results. *American journal of physical medicine & rehabilitation*. 2015;94(4):304-12.
12. Doherty-King B, Bowers B. How nurses decide to ambulate hospitalized older adults: development of a conceptual model. *The Gerontologist*. 2011;51(6):786-97.
13. Boltz M, Capezuti E, Shabbat N. Nursing staff perceptions of physical function in hospitalized older adults. *Applied nursing research : ANR*. 2011;24(4):215-22.
14. Commissie kwalificatiestructuur. Gekwalificeerd voor de toekomst. Kwalificatiestructuur en eindtermen voor Verpleging en Verzorging. Ministerie van onderwijs cewemv, welzijn en sport,; 1996.
15. International Council of Nurses. Definition of nursing 2018 [Available from: <http://www.icn.ch/who-we-are/icn-definition-of-nursing/>]
16. The Nursing and Midwifery Council. Standards for competence for registered nurses. 2010.

17. Nursing and Midwifery Board of Australia. Registered nurse standards for practice 2010 [Available from: <http://www.nursingmidwiferyboard.gov.au/Codes-Guidelines-Statements/Professional-standards/registered-nurse-standards-for-practice.aspx>.]
18. Canadian Nurses association. Framework for the Practice of Registered Nurses in Canada. 2015.
19. Doherty-King B, Yoon JY, Pecanac K, Brown R, Mahoney J. Frequency and duration of nursing care related to older patient mobility. *Journal of nursing scholarship : an official publication of Sigma Theta Tau International Honor Society of Nursing*. 2014;46(1):20-7.
20. Lazarus BA, Murphy JB, Coletta EM, McQuade WH, Culpepper L. The provision of physical activity to hospitalized elderly patients. *Archives of internal medicine*. 1991;151(12):2452-6.
21. Beyer N, Suetta C. Promotion of Physical Activity for Acutely Unwell Older People. *The Palgrave Handbook of Ageing and Physical Activity Promotion*: Springer; 2018. p. 185-205.
22. Bonner A, Sando J. Examining the knowledge, attitude and use of research by nurses. *Journal of nursing management*. 2008;16(3):334-43.
23. Chaudoir SR, Dugan AG, Barr CH. Measuring factors affecting implementation of health innovations: a systematic review of structural, organizational, provider, patient, and innovation level measures. *Implementation science : IS*. 2013;8:22.
24. Fleuren M, Wiefferink K, Paulussen T. Determinants of innovation within health care organizations: literature review and Delphi study. *International journal for quality in health care : journal of the International Society for Quality in Health Care*. 2004;16(2):107-23.

25. Godin G, Belanger-Gravel A, Eccles M, Grimshaw J. Healthcare professionals' intentions and behaviours: a systematic review of studies based on social cognitive theories. *Implementation science* : IS. 2008;3:36.
26. Grol R, Grimshaw J. From best evidence to best practice: effective implementation of change in patients' care. *Lancet* (London, England). 2003;362(9391):1225-30.
27. Huijg JM, Gebhardt WA, Verheijden MW, van der Zouwe N, de Vries JD, Middelkoop BJ, et al. Factors influencing primary health care professionals' physical activity promotion behaviors: a systematic review. *International journal of behavioral medicine*. 2015;22(1):32-50.
28. Kajermo KN, Uden M, Gardulf A, Eriksson LE, Orton ML, Arnetz BB, et al. Predictors of nurses' perceptions of barriers to research utilization. *Journal of nursing management*. 2008;16(3):305-14.
29. Maue SK, Segal R, Kimberlin CL, Lipowski EE. Predicting physician guideline compliance: an assessment of motivators and perceived barriers. *The American journal of managed care*. 2004;10(6):383-91.
30. Ploeg J, Davies B, Edwards N, Gifford W, Miller PE. Factors influencing best-practice guideline implementation: lessons learned from administrators, nursing staff, and project leaders. *Worldviews on evidence-based nursing*. 2007;4(4):210-9.
31. Elo S, Kyngas H. The qualitative content analysis process. *Journal of advanced nursing*. 2008;62(1):107-15.
32. Hsieh HF, Shannon SE. Three approaches to qualitative content analysis. *Qualitative health research*. 2005;15(9):1277-88.
33. V&V 2020. V&V 2020 Deel 3 Beroepsprofiel Verpleegkundige. 2012.

34. The Nurse and Midwifery Council. Future nurse: Standards of proficiency for registered nurses. 2018.
35. Kneafsey R, Clifford C, Greenfield S. What is the nursing team involvement in maintaining and promoting the mobility of older adults in hospital? A grounded theory study. *International journal of nursing studies*. 2013;50(12):1617-29.
36. Dermody G, Kovach CR. Barriers to Promoting Mobility in Hospitalized Older Adults. *Research in gerontological nursing*. 2018;11(1):17-27.
37. Moore JE, Mascarenhas A, Marquez C, Almaawiy U, Chan WH, D'Souza J, et al. Mapping barriers and intervention activities to behaviour change theory for Mobilization of Vulnerable Elders in Ontario (MOVE ON), a multi-site implementation intervention in acute care hospitals. *Implementation science : IS*. 2014;9:160.
38. Ball JE, Murrells T, Rafferty AM, Morrow E, Griffiths P. 'Care left undone' during nursing shifts: associations with workload and perceived quality of care. *BMJ quality & safety*. 2014;23(2):116-25.
39. Aiken LH, Sloane DM, Bruyneel L, Van den Heede K, Griffiths P, Busse R, et al. Nurse staffing and education and hospital mortality in nine European countries: a retrospective observational study. *Lancet (London, England)*. 2014;383(9931):1824-30.
40. Jonkman NH, van Schooten KS, Maier AB, Pijnappels M. eHealth interventions to promote objectively measured physical activity in community-dwelling older people. *Maturitas*. 2018;113:32-9.
41. Hoyer EH, Friedman M, Lavezza A, Wagner-Kosmakos K, Lewis-Cherry R, Skolnik JL, et al. Promoting mobility and reducing length of stay in hospitalized general medicine patients: A quality-improvement project. *Journal of hospital medicine*. 2016;11(5):341-7.

42. Liu B, Moore JE, Almaawiy U, Chan WH, Khan S, Ewusie J, et al. Outcomes of Mobilisation of Vulnerable Elders in Ontario (MOVE ON): a multisite interrupted time series evaluation of an implementation intervention to increase patient mobilisation. *Age and ageing*. 2018;47(1):112-9.
43. So C, Pierluissi E. Attitudes and expectations regarding exercise in the hospital of hospitalized older adults: a qualitative study. *Journal of the American Geriatrics Society*. 2012;60(4):713-8.

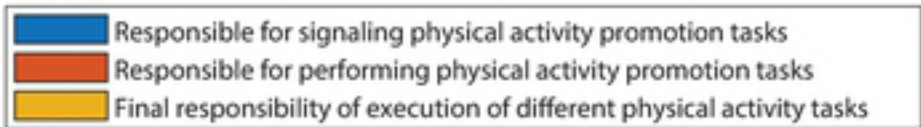

bioRxiv preprint doi: <https://doi.org/10.1101/482976>; this version posted November 29, 2018. The copyright holder for this preprint (which was not certified by peer review) is the author/funder, who has granted bioRxiv a license to display the preprint in perpetuity. It is made available under aCC-BY 4.0 International license.

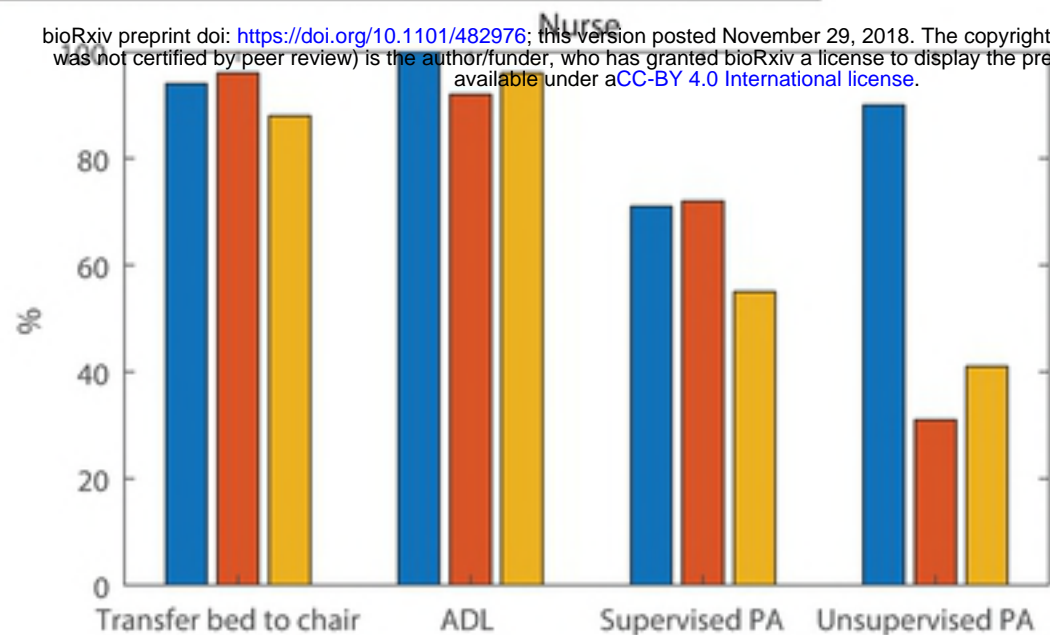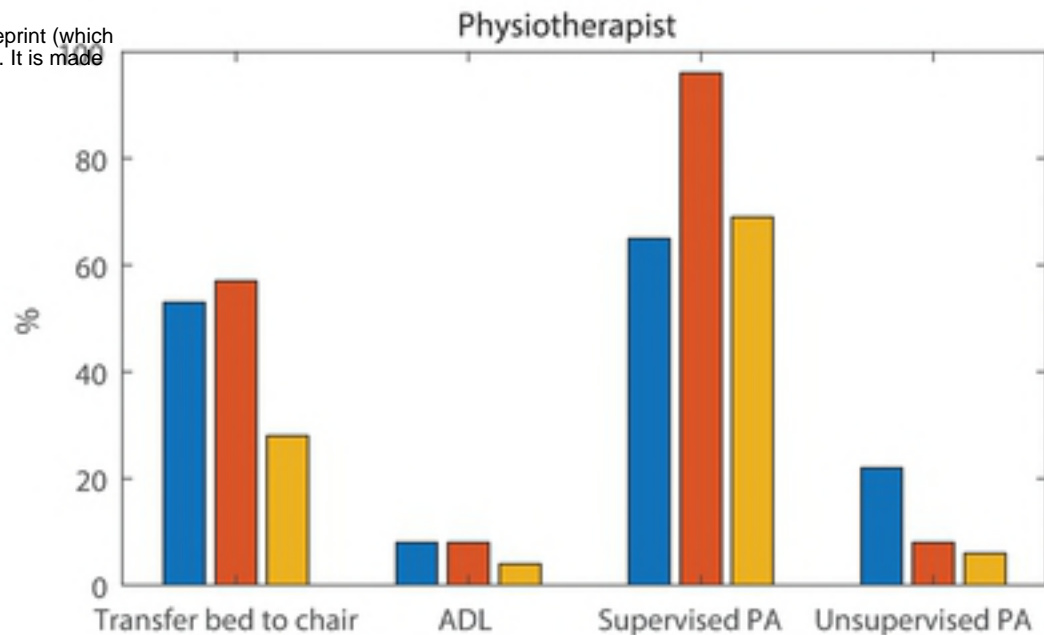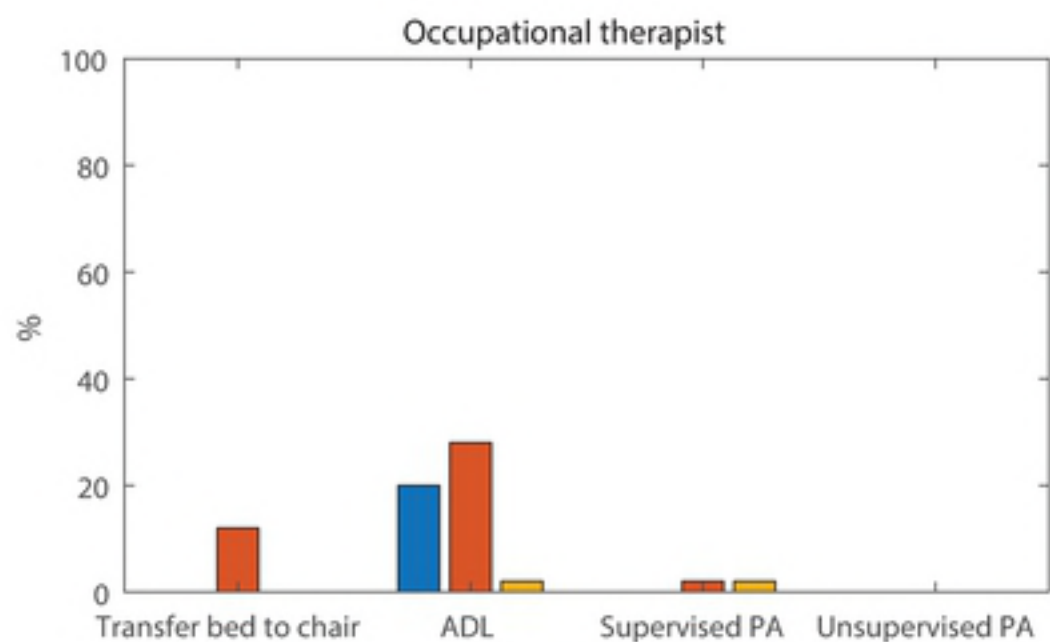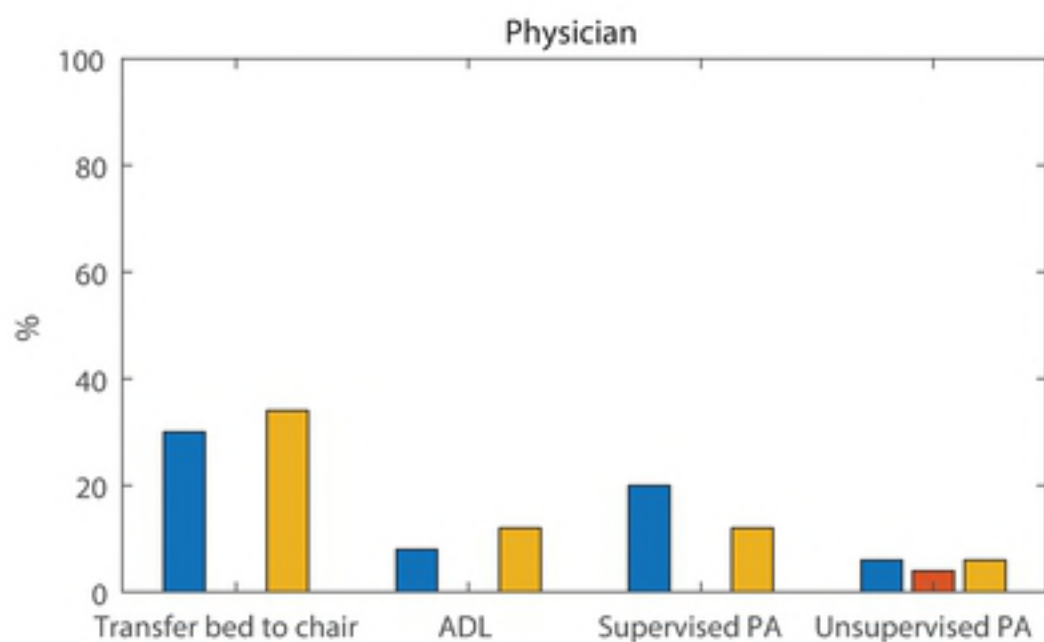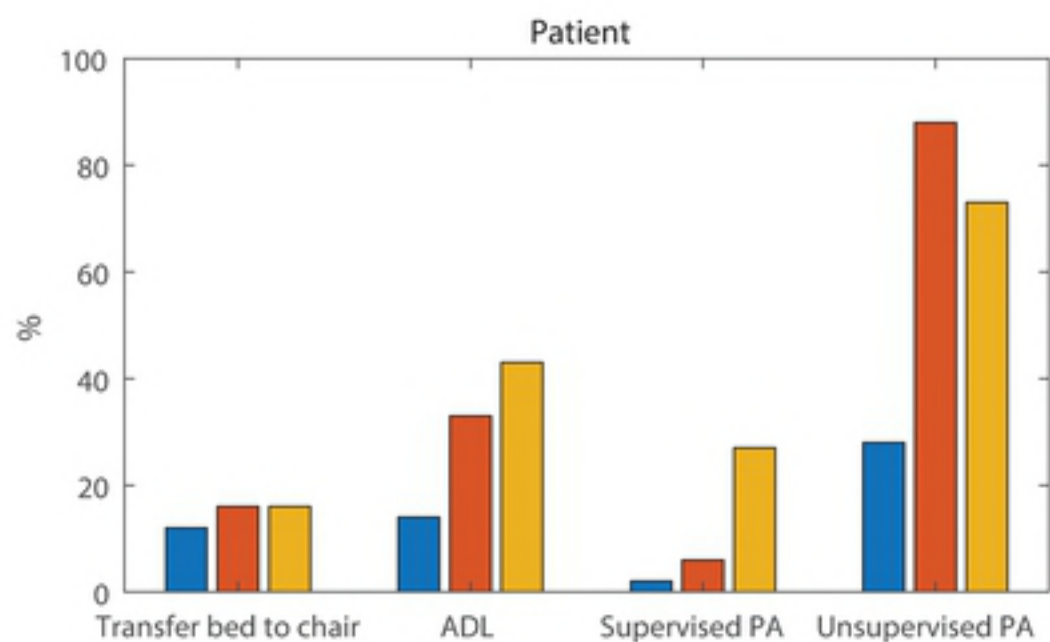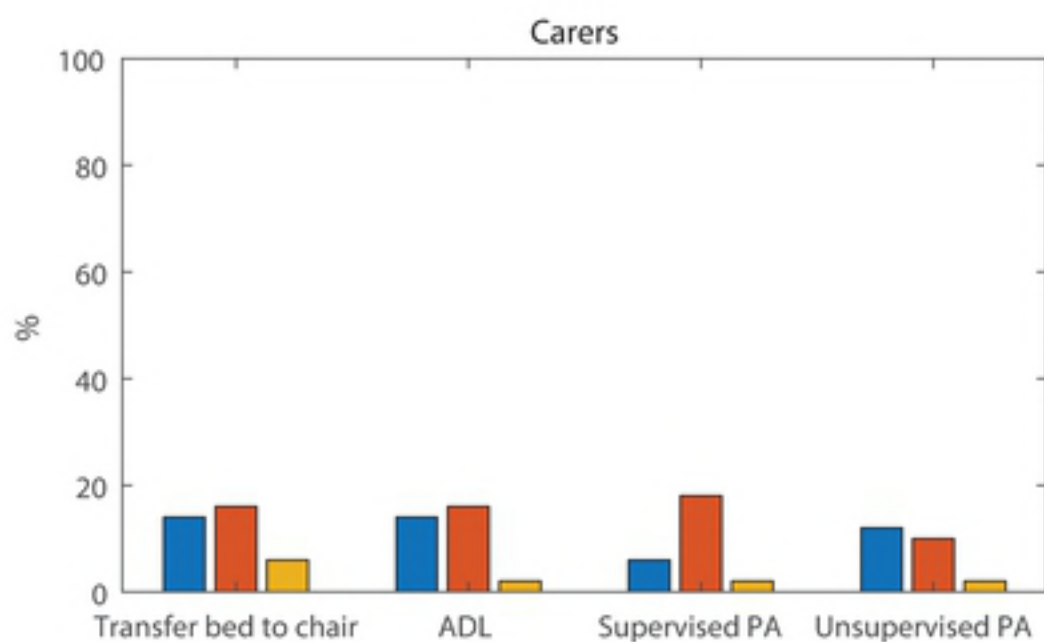

Fig 1
